# Supplementary material for: 8-Aza-2′-deoxyguanosine: Base pairing, mismatch discrimination and nucleobase anion fluorescence sensing in single-stranded and duplex DNA
Source: Royal Society of Chemistry journal article supplement (doi:10.1039/b908017a), 2009-01-01
Supplement: b908017a.pdf [file b908017a.pdf]

## Supporting Information

### 8-Aza-2'-deoxyguanosine: Base Pairing, Mismatch Discrimination and Nucleobase Anion Fluorescence Sensing in Single-Stranded and Duplex DNA

Frank Seela\*, Dawei Jiang, Kuiying Xu

*Laboratory of Bioorganic Chemistry and Chemical Biology, Center for Nanotechnology, Heisenbergstraße 11, 48149 Münster, Germany and Laboratorium für Organische und Bioorganische Chemie, Institut für Chemie, Universität Osnabrück, Barbarastraße 7, 49069 Osnabrück, Germany*

#### Table of contents

|                                                                                                                |    |
|----------------------------------------------------------------------------------------------------------------|----|
| Table S1. Fluorescence excitation and emission wavelengths.....                                                | 2  |
| Figure S2. UV spectra of dG and nucleoside <b>9</b> .....                                                      | 2  |
| Figure S3. UV spectrum of nucleoside <b>9</b> .....                                                            | 3  |
| Figure S4. Expanded spectrum of the pH-dependent fluorescence emission curve<br>of duplex <b>18 · 21</b> ..... | 3  |
| Figure S5. <sup>1</sup> H NMR spectrum of compound <b>15</b> .....                                             | 4  |
| Figure S6. <sup>13</sup> C NMR spectrum of compound <b>15</b> .....                                            | 5  |
| Figure S7. <sup>1</sup> H NMR spectrum of compound <b>9</b> .....                                              | 6  |
| Figure S8. <sup>13</sup> C NMR spectrum of compound <b>9</b> .....                                             | 7  |
| Figure S9. <sup>1</sup> H NMR spectrum of compound <b>16</b> .....                                             | 8  |
| Figure S10. <sup>13</sup> C NMR spectrum of compound <b>16</b> .....                                           | 9  |
| Figure S11. <sup>1</sup> H NMR spectrum of compound <b>17</b> .....                                            | 10 |
| Figure S12. <sup>13</sup> C NMR spectrum of compound <b>17</b> .....                                           | 11 |
| Figure S13. <sup>1</sup> H NMR spectrum of compound <b>11</b> .....                                            | 12 |
| Figure S14. <sup>31</sup> P NMR spectrum of compound <b>11</b> .....                                           | 13 |

**Table S1** Fluorescence excitation and emission wavelengths at different pH values utilized for the determination of the  $pK_a$  value.

| pH value | Excitation wavelength [nm] | Emission wavelength [nm] |
|----------|----------------------------|--------------------------|
| 4.4      | 254                        | 346                      |
| 5.2      | 255                        | 346                      |
| 5.8      | 256                        | 347                      |
| 6.3      | 272                        | 351                      |
| 7.1      | 277                        | 358                      |
| 8.0      | 277                        | 359                      |
| 8.4      | 277                        | 359                      |
| 8.7      | 278                        | 359                      |
| 9.3      | 278                        | 358                      |
| 9.8      | 278                        | 358                      |
| 10.2     | 278                        | 359                      |
| 10.8     | 278                        | 359                      |

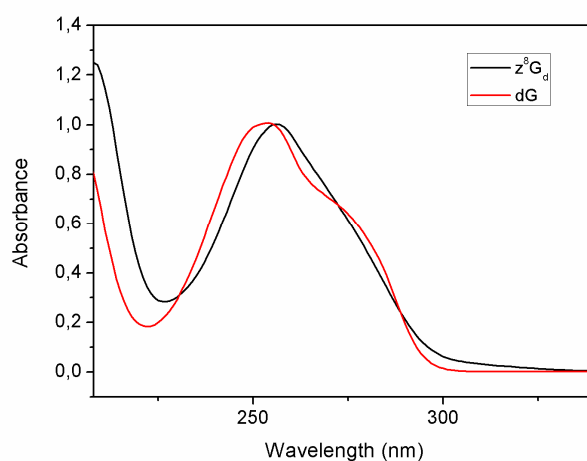

**Figure S2** UV spectra of dG and nucleoside **9**, measured in MeOH (at identical concentrations).

Extinction coefficients: dG  $\epsilon_{254} = 13450$ ,  $\epsilon_{260} = 11900$ ;  $z^8G_d$  (**9**)  $\epsilon_{257} = 13400$ ,  $\epsilon_{260} = 12660$ .

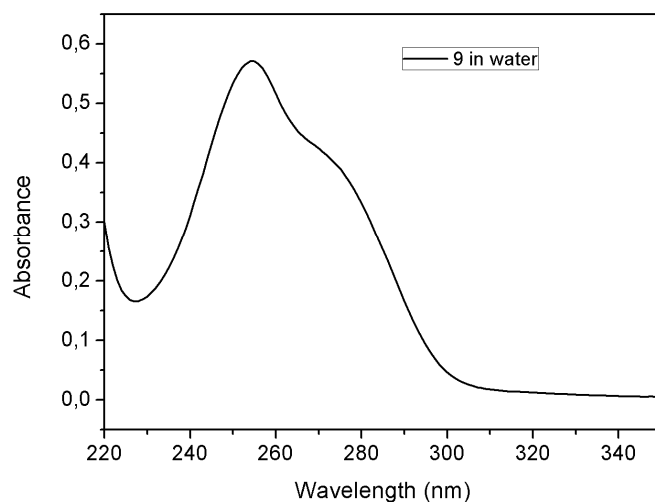

**Figure S3** UV spectra of nucleoside **9**, measured in H<sub>2</sub>O.

Extinction coefficients:  $z^8G_d$  (**9**)  $\epsilon_{254} = 11400$ ,  $\epsilon_{260} = 10300$ .

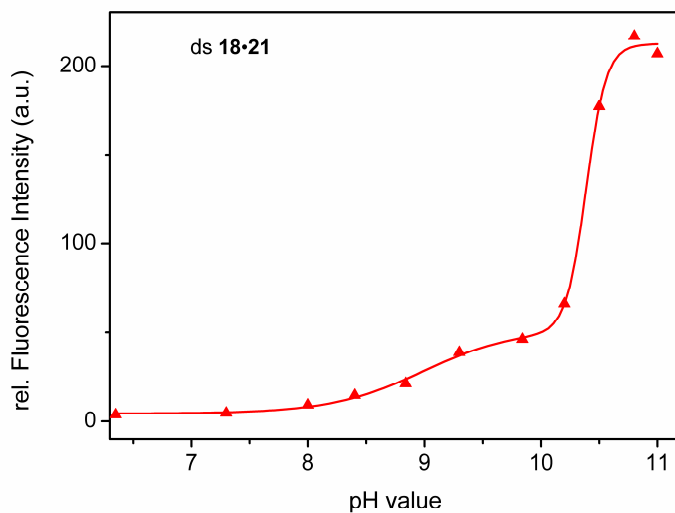

**Figure S4** Expanded spectrum of the pH-dependent fluorescence emission curve of duplex **18•21** (see manuscript Figure 5). Measurements were performed in 1.0 M NaCl, 60mM Na-cacodylate buffer (5  $\mu$ M concentration for each ss oligonucleotide). Excitation wavelength = 277 nm; emission at 360 nm. The  $pK_a$  values are 9.1 and 10.4.

8-Aza-2'-deoxy-3',5'-di-O-(4-toluoyl)-guanosine

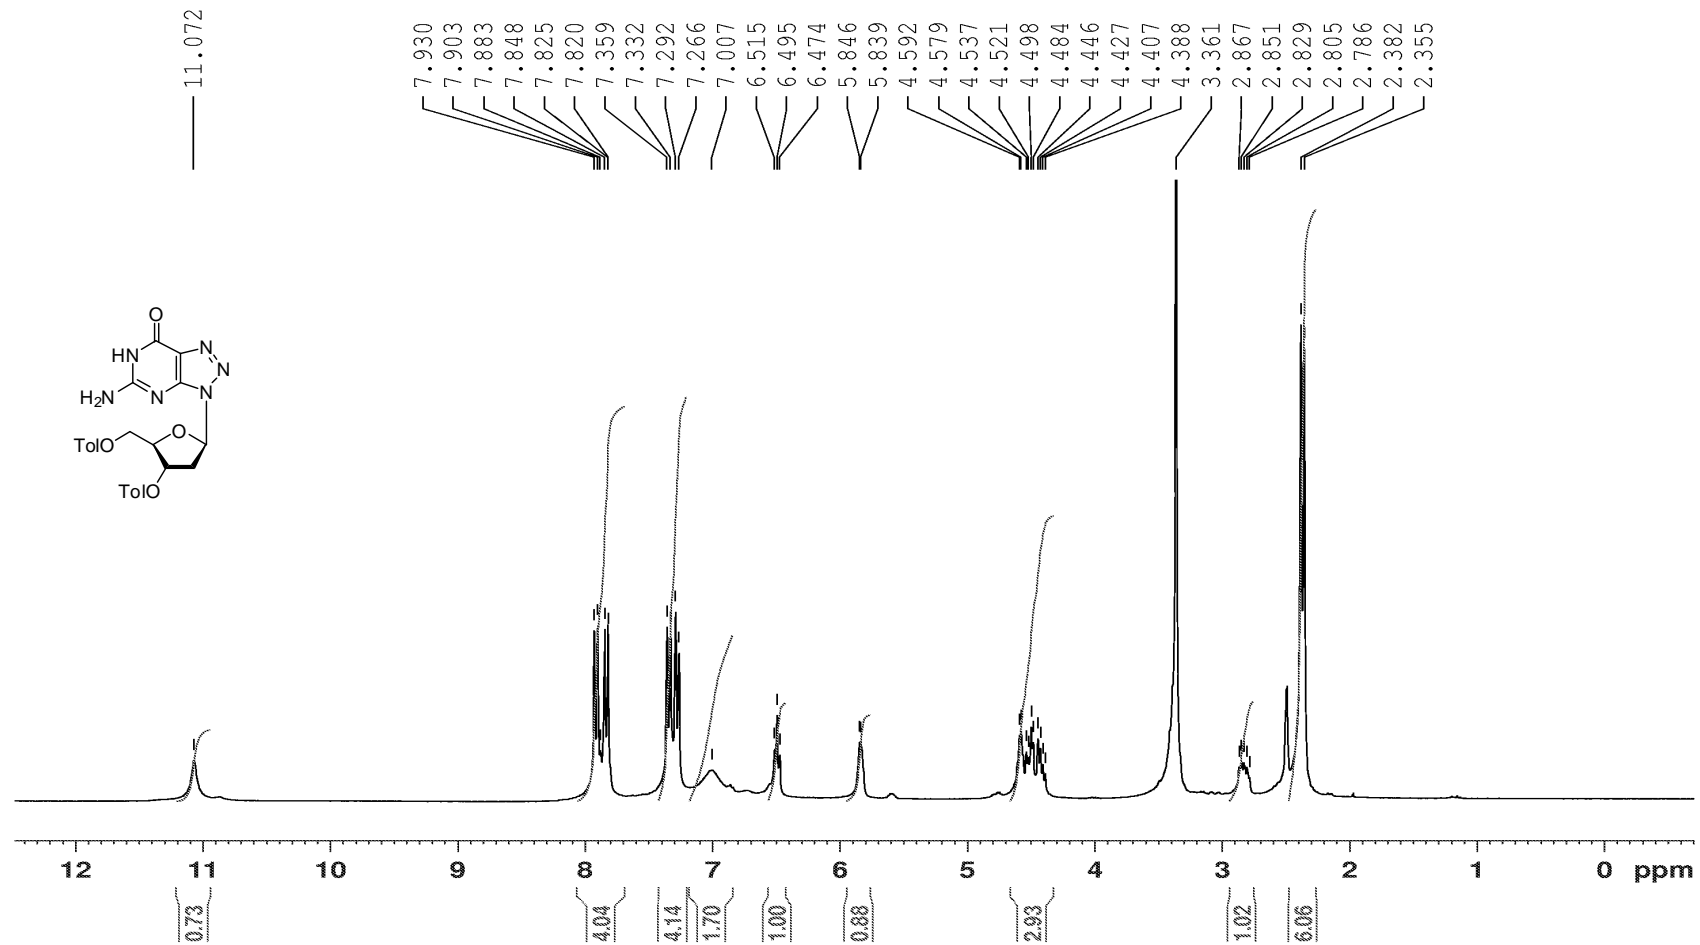

Figure S5. <sup>1</sup>H-NMR spectrum of compound 15.

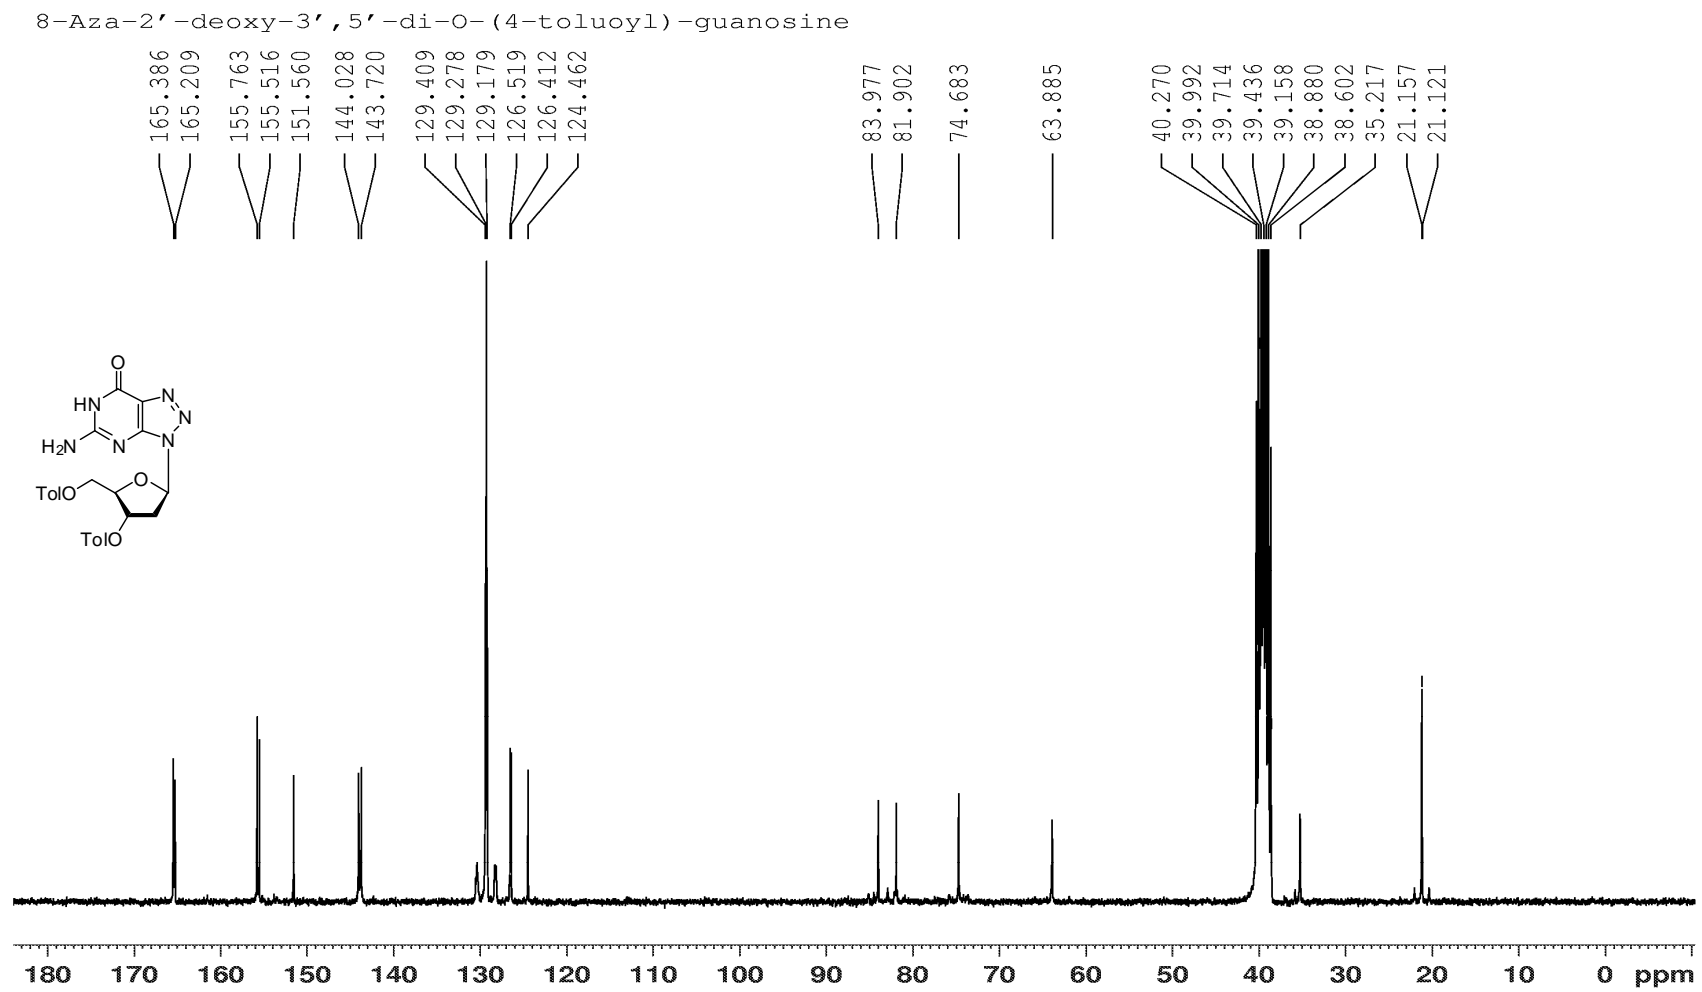

Figure S6.  $^{13}\text{C}$ -NMR spectrum of compound 15.

8-Aza-2'-deoxyguanosine

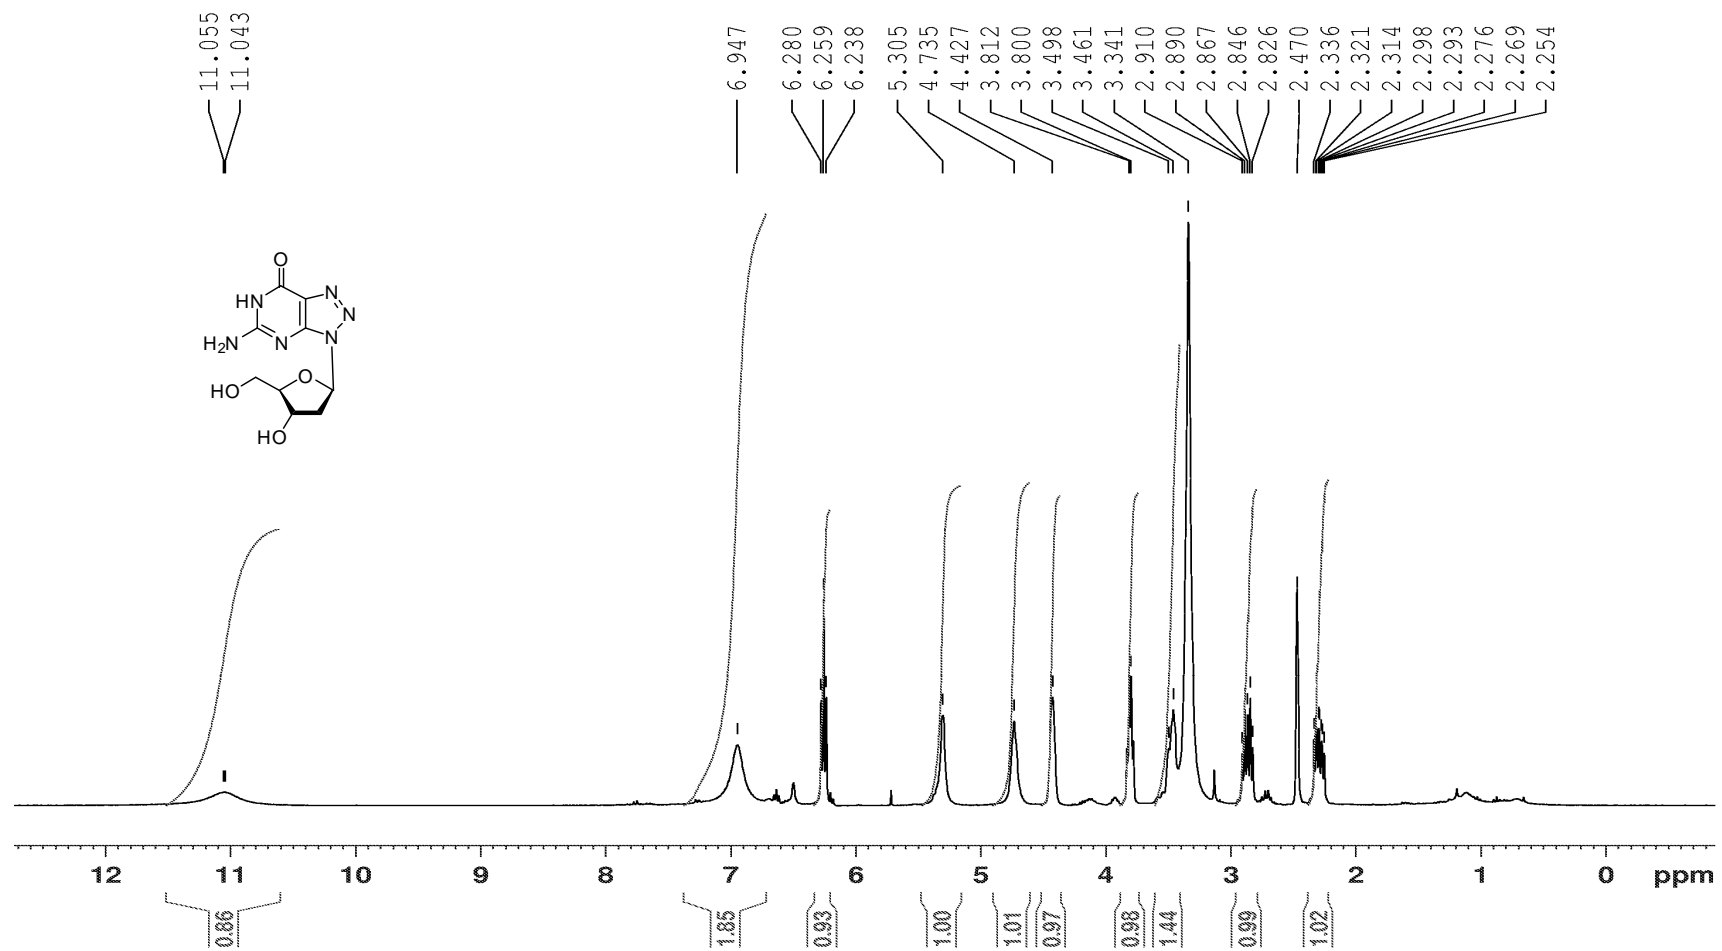

Figure S7. <sup>1</sup>H-NMR spectrum of compound 9.

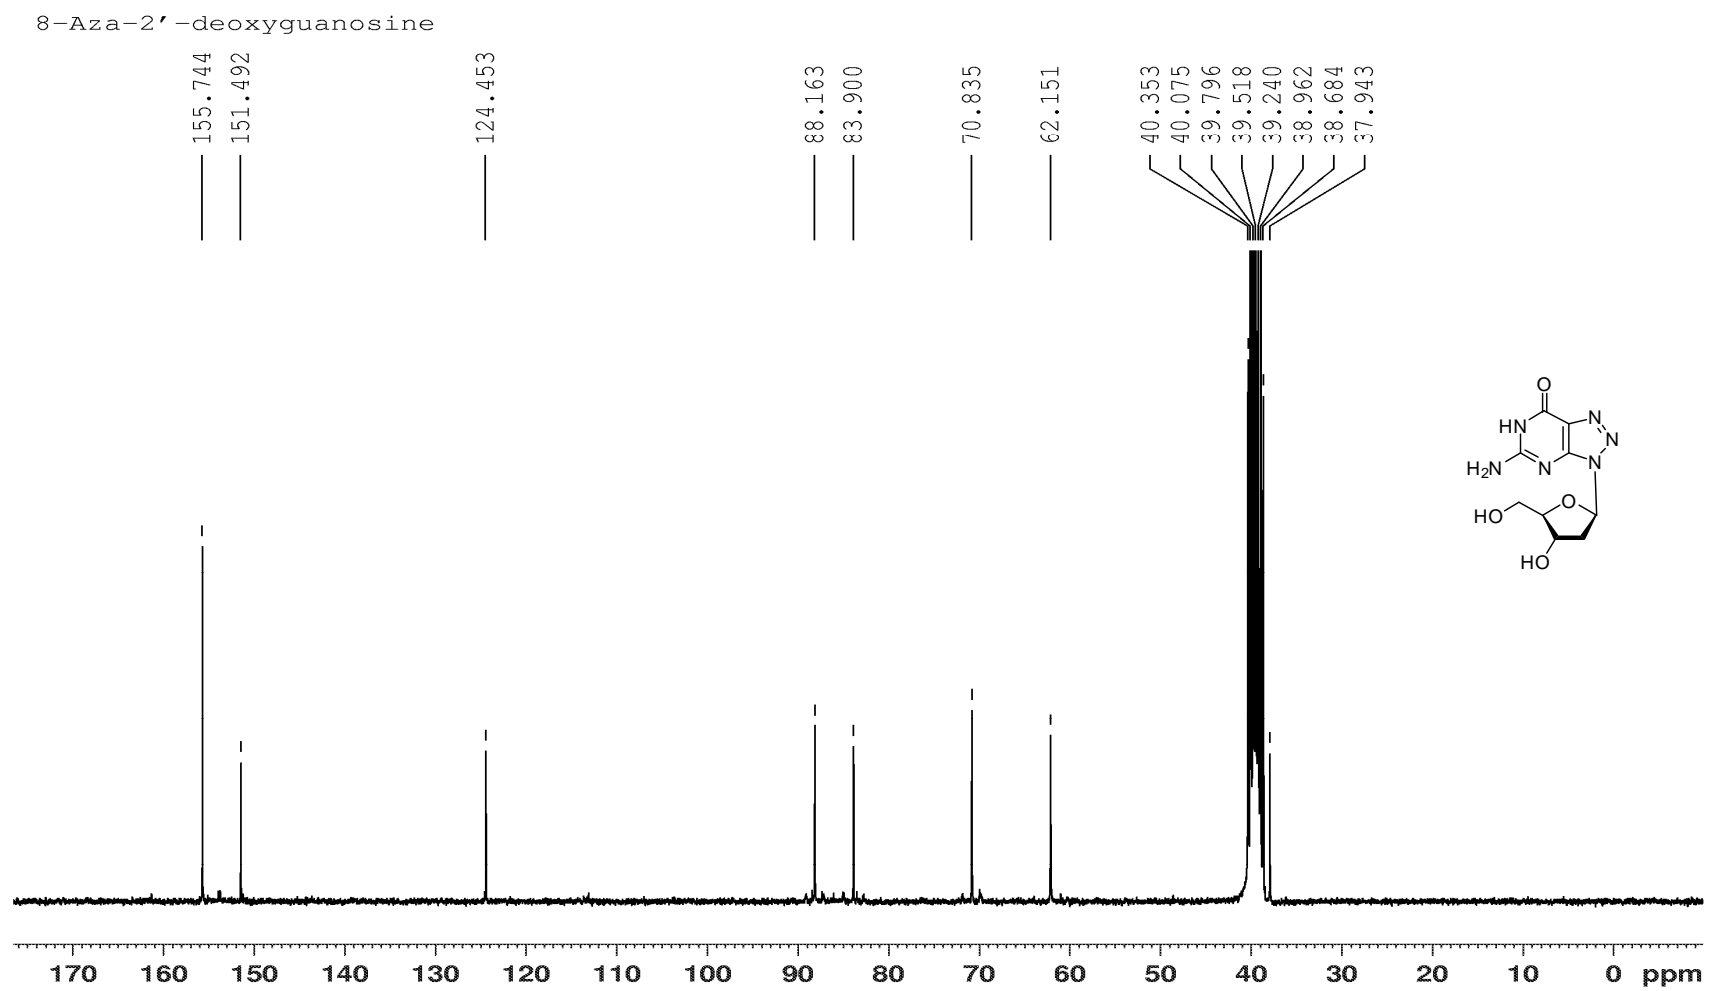

Figure S8.  $^{13}\text{C}$ -NMR spectrum of compound 9.

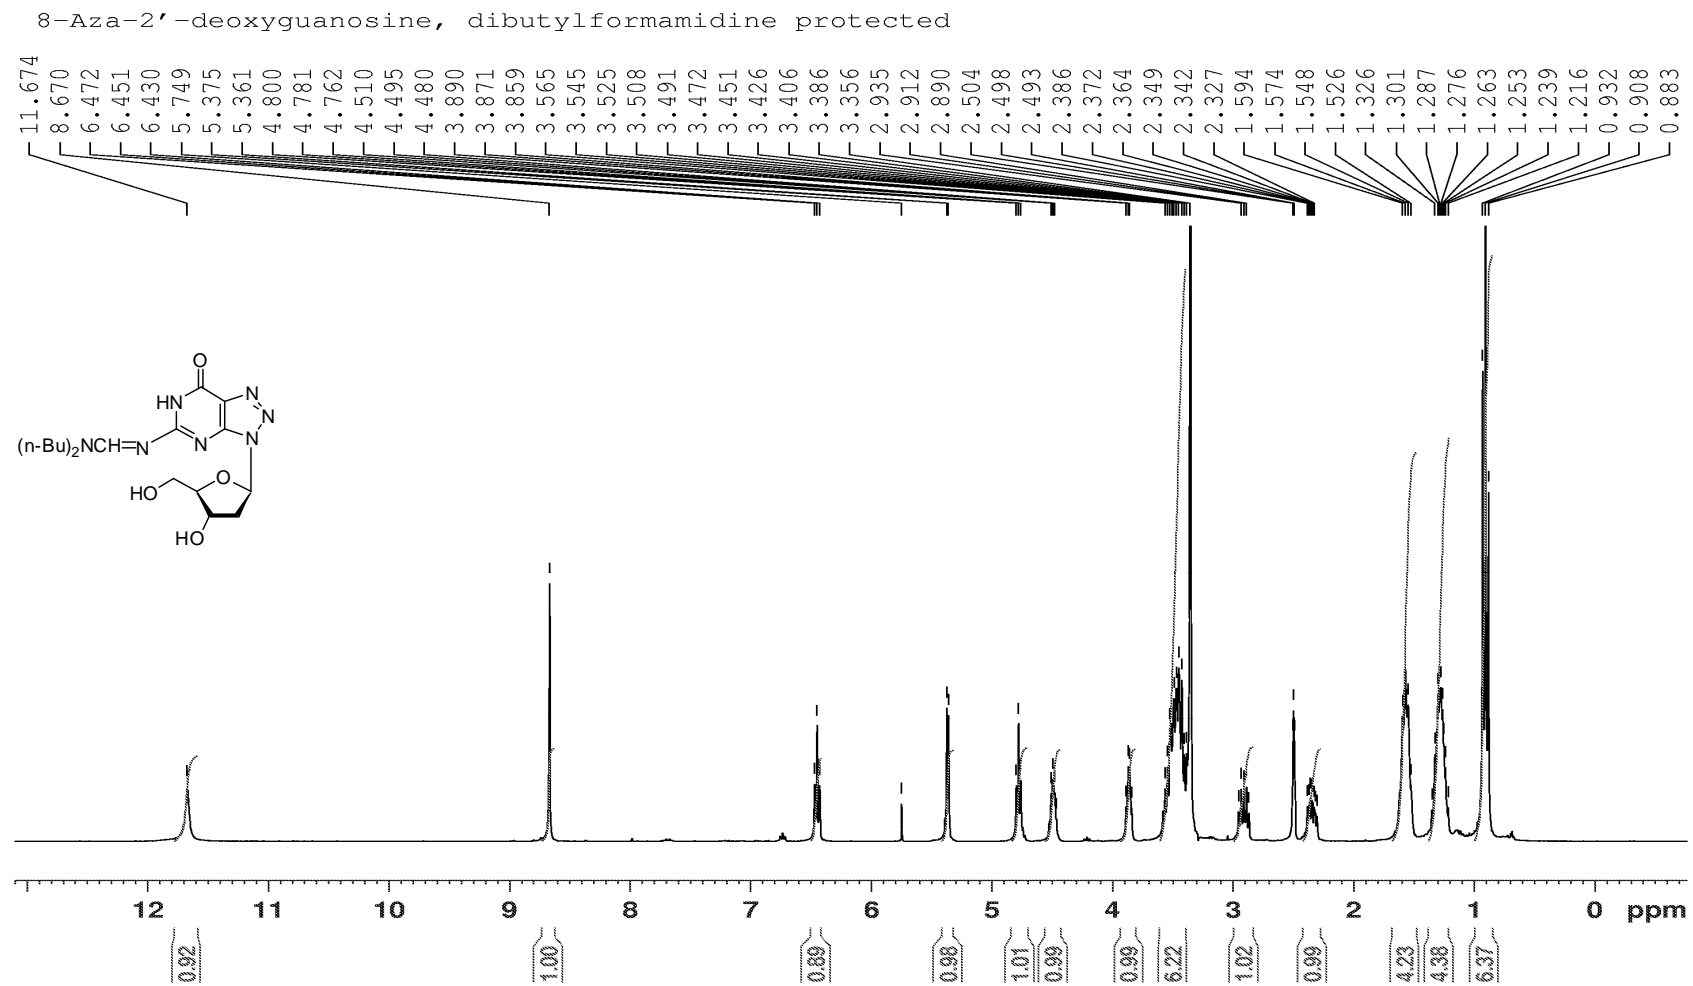

Figure S9.  $^1\text{H}$ -NMR spectrum of compound 16.



8-Aza-2'-deoxyguanosine, dibutylformamidinium protected

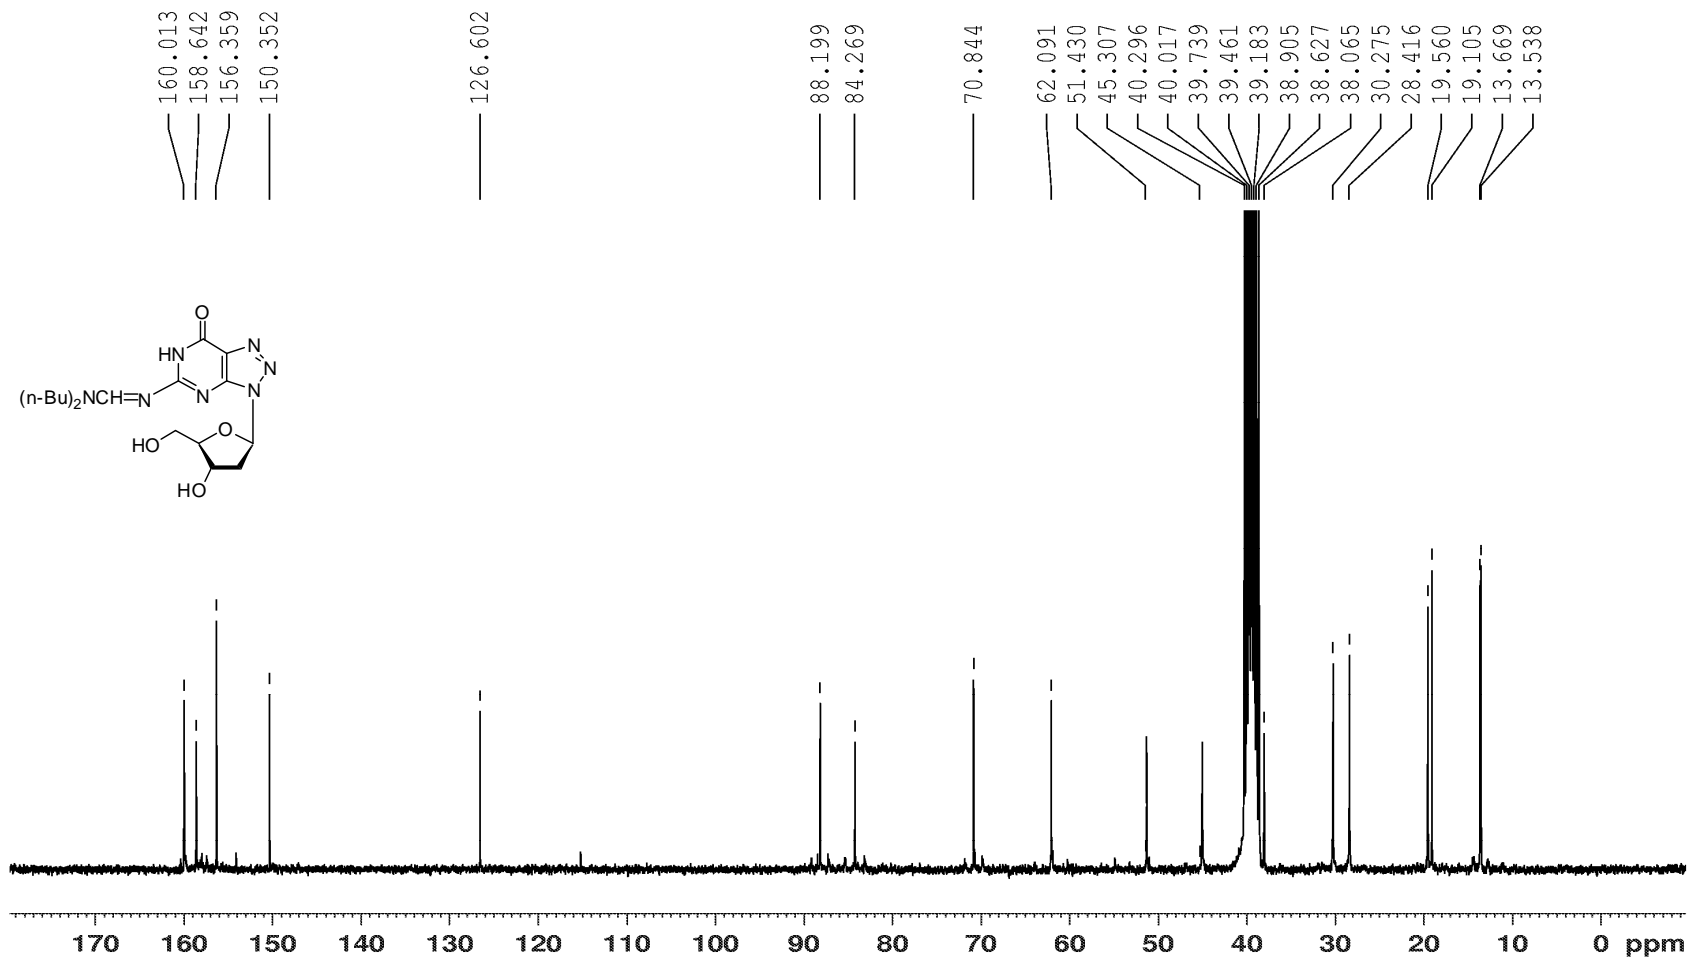

Figure S10. <sup>13</sup>C-NMR spectrum of compound 16.

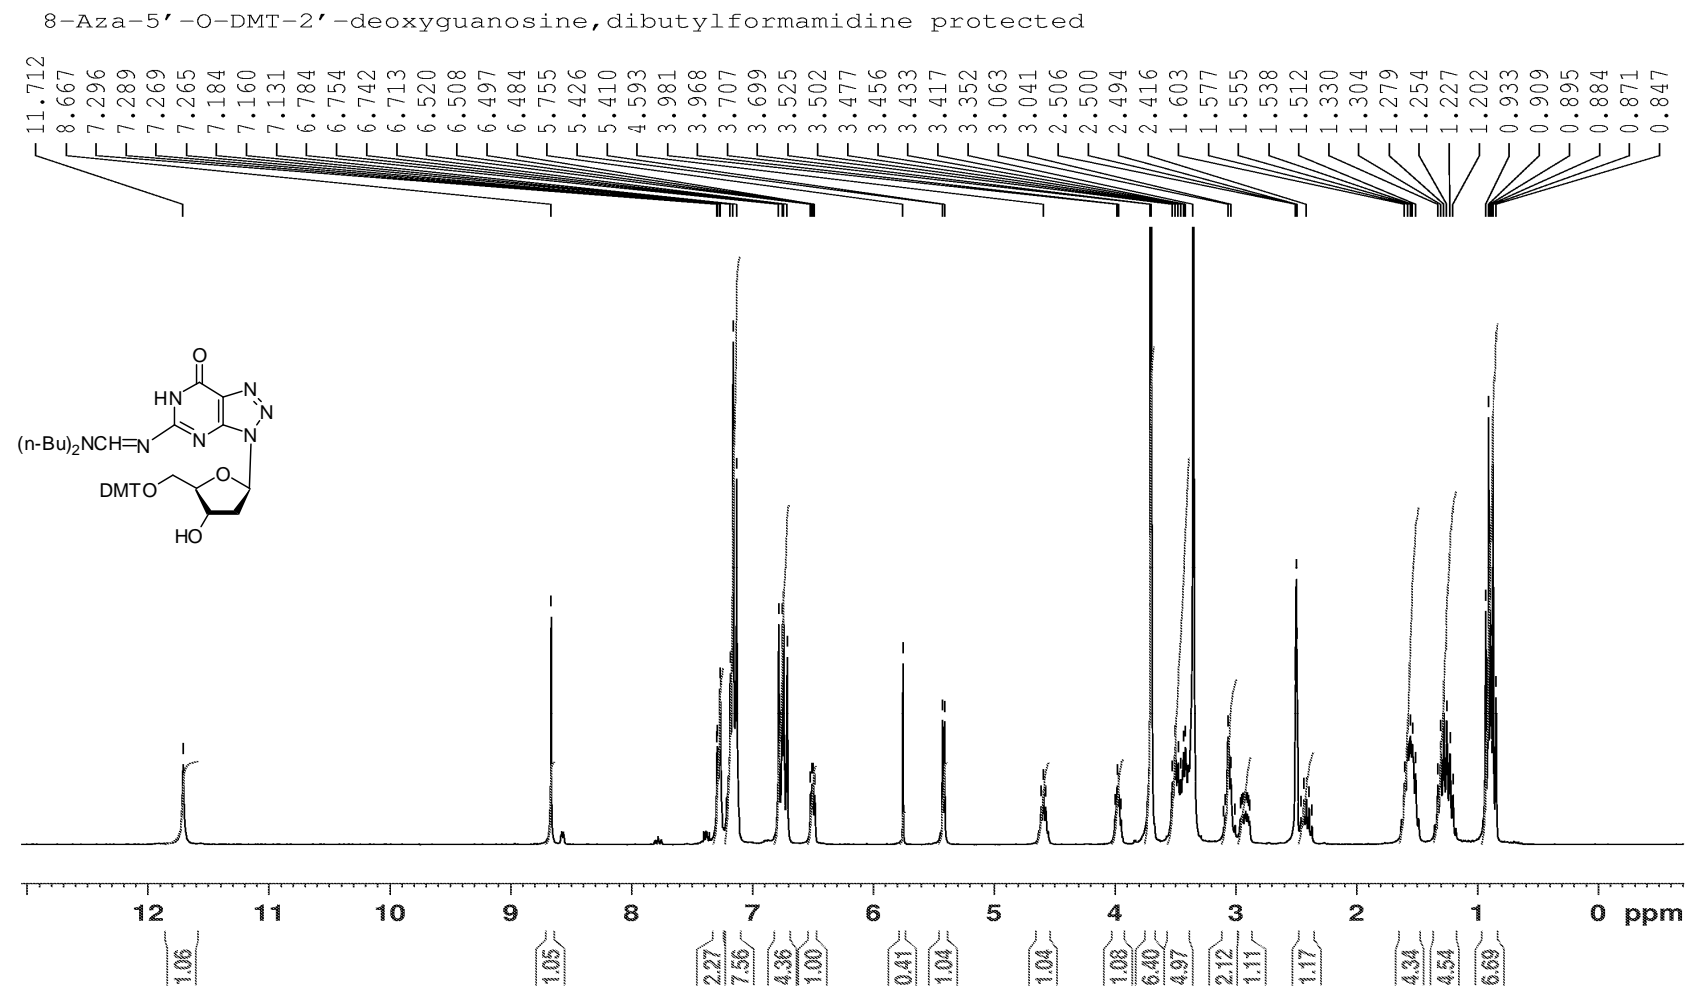

Figure S11.  $^1\text{H-NMR}$  spectrum of compound 17.

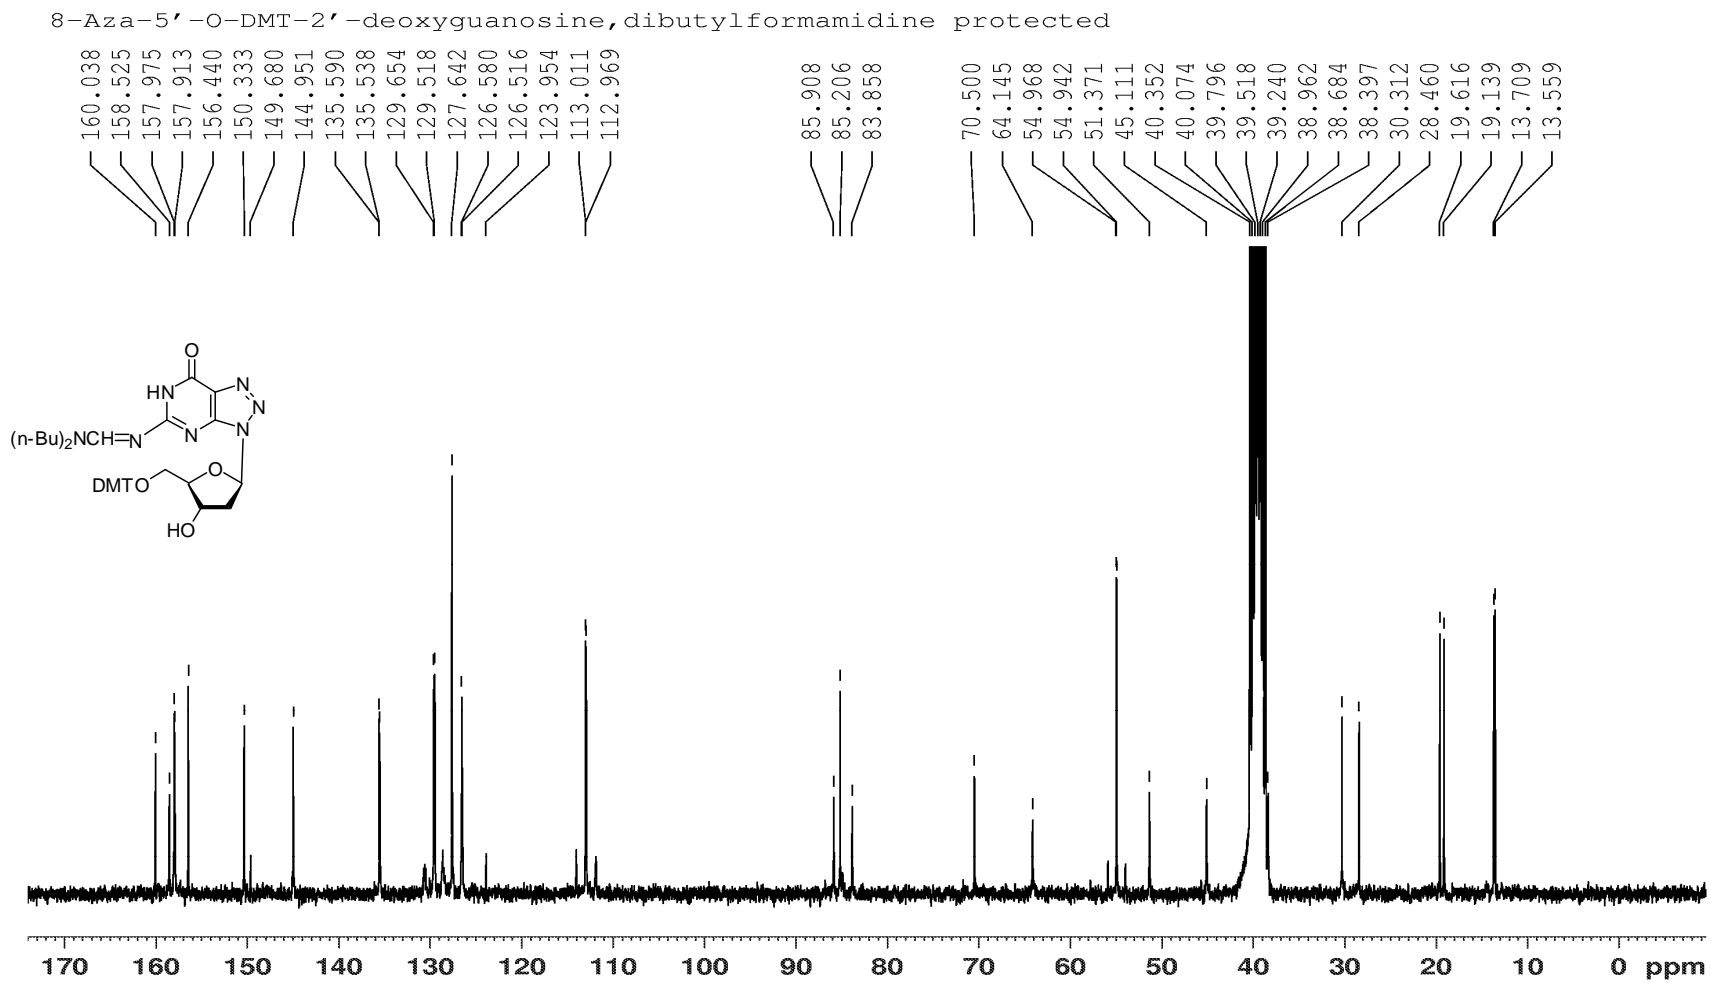

Figure S12. <sup>13</sup>C-NMR spectrum of compound 17.

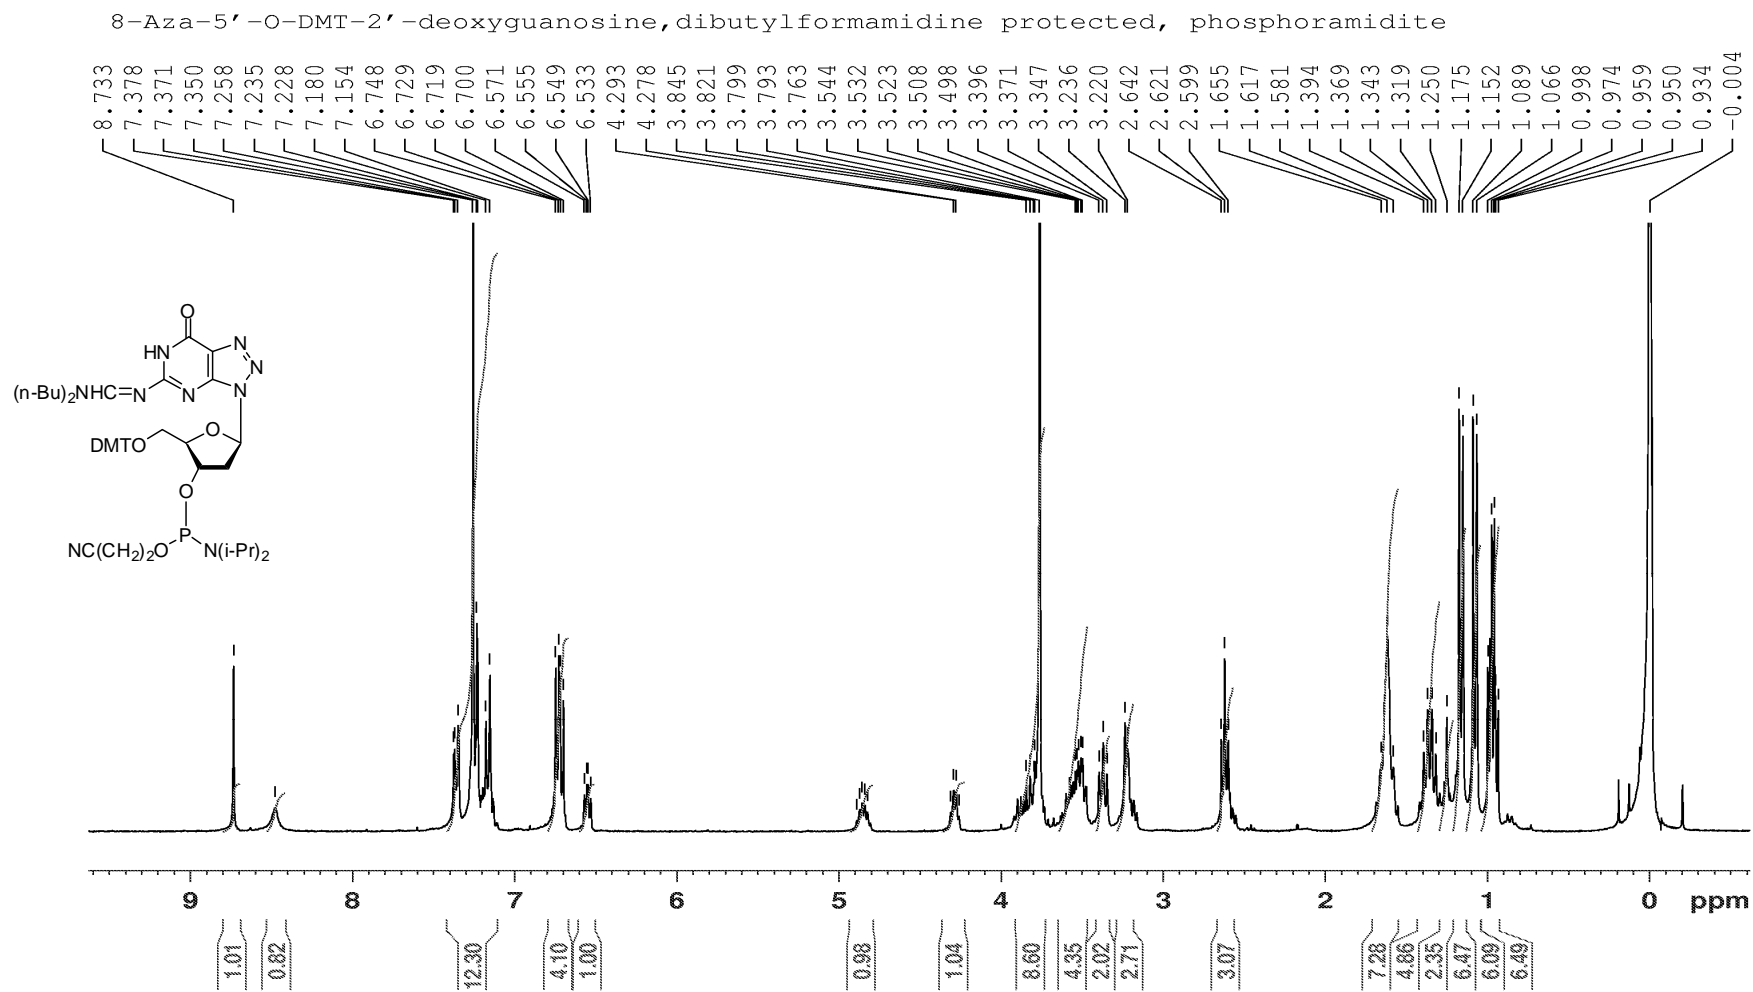

Figure S13.  $^1\text{H-NMR}$  spectrum of compound 11.

8-Aza-5'-O-DMT-2'-deoxyguanosine, dibutylformamidinium protected, phosphoramidite

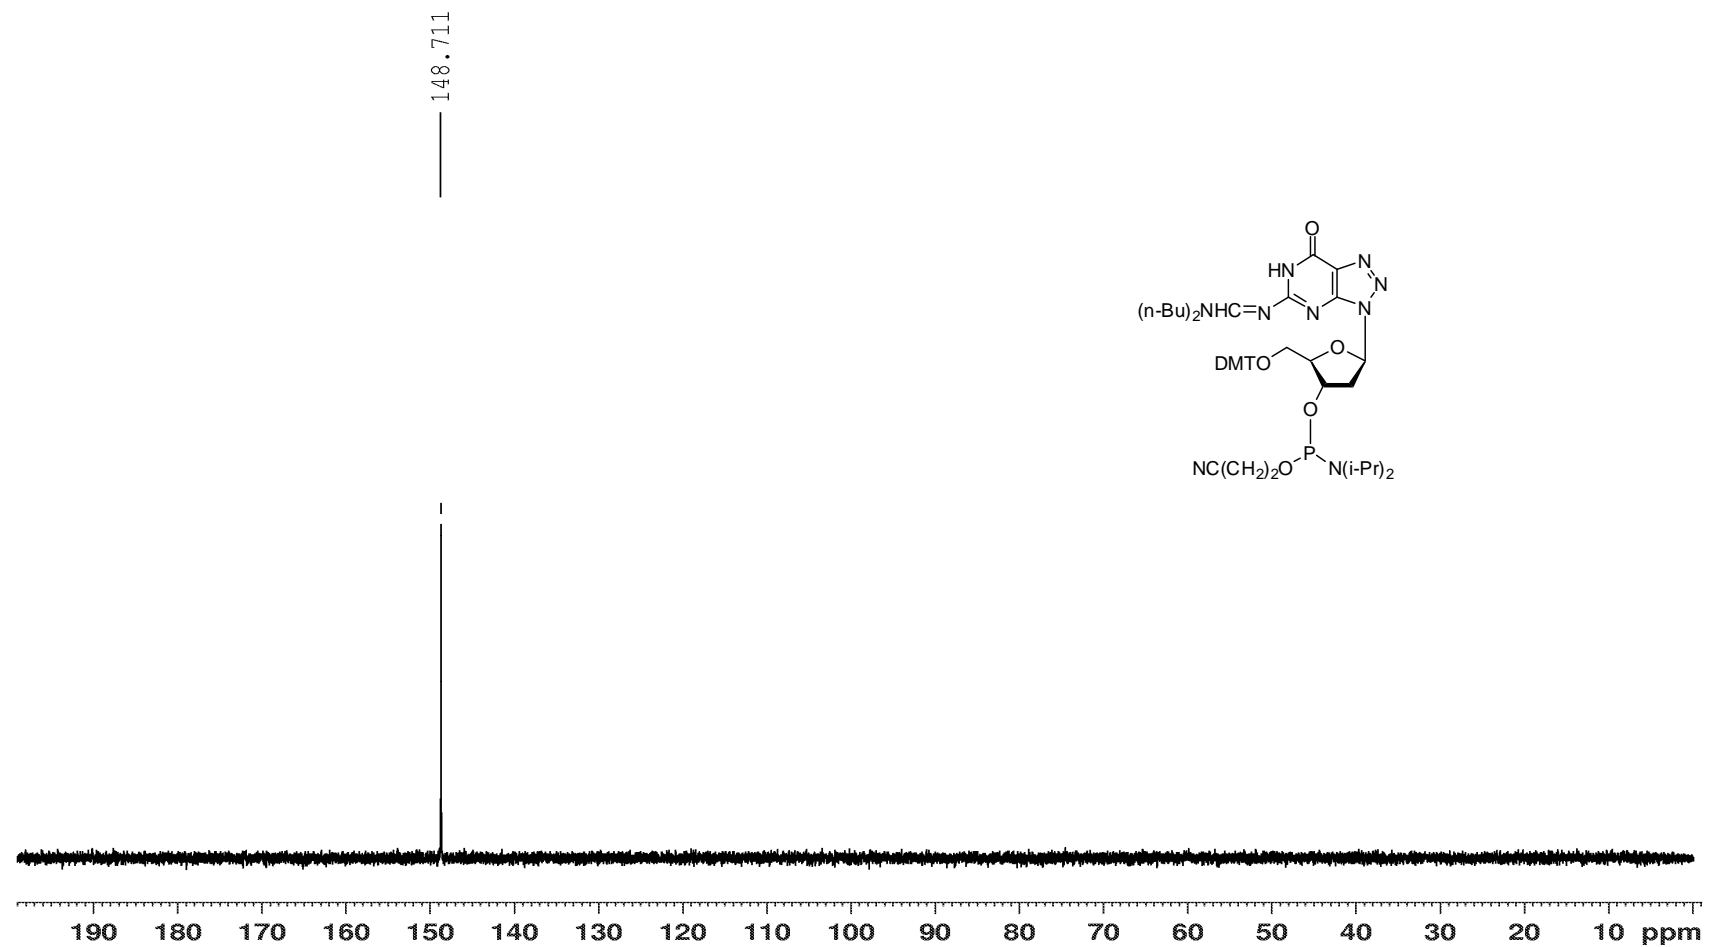

Figure S14.  $^{31}\text{P}$ -NMR spectrum of compound 11.
